# Supplementary material
Source: PubMed Central journal article supplement (PMC169954)
Supplement: nar_31_15_4391__1.pdf [file nar_31_15_4391__1.pdf]

## Supplementary Material: Full sequence alignment for the RPB7 family

```

RPOE_METMA|21226698 -----MYKLMKLVDTVRIIP 14
RPOE_METAC|20092492 -----MYKLMKLIDTVRIIP 14
RPOE_METBA|23051810 -----MYKMMKLVDTVRIIP 14
RPOE_ARCFU|11498717 -----MYARIKLRDTVVRVP 14
RPOE_METTH|15678292 -----MYYVTKIVDTVRIIP 14
RPOE_PYRHO|14591652 -----MYKIVTVKDVVRIIP 14
RPOE_PYRAB|14521883 -----MYKIVTVKDVVRIIP 14
RPOE_PYRFU|18976628 -----MYKIVTVKDVVRIIP 14
RPOE_METJA|15668573 -----MYKILEIADVVKVP 14
RPOE_HALO|15790905 -----MYKRARLKDTIEVP 14
RPOE_THEAC|16082590 -----MYMLVEDKYIARVP 14
RPOE_THEVO|13541317 -----MYMMVEDKYIARIP 14
RPOE_FERAC|22406866 -----MYILLEDEYVIRVP 14
RPOE_METKA|20094887 -----MYELVELETTVRIIP 14
RPOE_SULTO|15920582 -----MFKLIKAKGIIRIP 14
RPOE_SULAC|730613 -----MFKLVRAKGIVRIIP 14
RPOE_SULSO|15897347 -----MYKLIKARSIVRIIP 14
RPOE_PYRAE|18314155 -----MPFRLVEAEDYVRVP 15
RPOE_AERPE|14600570 -----MYEYVVEEWIGMEP 15
RPC25_YEAST|6322705 -----MFILSKIADLVRIP 14
RPC25_SCHPO|19112860 -----MFLLSRFSDIISIH 14
RPC25_MOUSE|21313542 -----MFVLVEMVDTVPIIP 14
RPC25_HUMAN|22068810 -----MFVLVEMVDTVRIIP 14
RPC25_DROME|7294695 -----MFVLAELKDNVRIA 14
PPC25_ARATH|15222202 -----MFYLSELEHSLRVP 14
RPC25_CAEEL|17566938 -----MFILSLLHDTVAIQ 14
RPB7_SCHPO|19114885 -----MPFFLKELSLTISLH 15
RPB7_CANAL|12655858 -----MFFLKDSLNLTLH 14
RPB7_YEAST|6320612 -----MFFIKDSLNLTLH 14
RPB7_DROME|23171325 -----MFYHISLEQEILLH 14
RPB7_ANOGA|21288656 -----MFYHISLEHEILLH 14
RPB7_HUMAN|4505947 -----MFYHISLEHEILLH 14
RPB7_CAEEL|17510349 -----MFFHLSLDHEVCLH 14
RPB7_ARATH|15237831 -----MFFHIVLERNMQLH 14
RPB7_SOYBN|1173137 -----MFFHIVLERNMQLH 14
RPB7_ENCCU|19074596 -----MFFVRDFVQNIHLS 14
RPB7_PLAFA|23508072 -----MYFVIEEWKNVIK 14
RPB7_PLAYO|23481815 -----MYFVIEEWKNVIK 14
RPB7_GILTH|13811986 -----MYAIMTLNQNLFIP 14
RPA43_YEAST|6324916 -----MSQVKRANENRETARFIKHKHKQVTNPIDEKNGTSNCIVRVPIALYVSLA 50
RPA43_SCHPO|19113457 -----MPDLSLYKQTVDLYLSIA 18
RPA43_DROME|7297185 -----MAKILQKYIKFSVKELENYAS-----SPESCVRGITDMHLAMG 39
RPA43_ANOGA|21288304 -----MHRRTTIKTYTKFSAEELQKSTA-----DPLSCVAAVQLNEILSLR 40
RPA43_HUMAN|20539462 MAAGCSEAPRPAASDGLVGGAGVLPCLLELPTYAAACALVNSRYSCLVAGPHQRHIALS 60
RPA43_MOUSE|20847950 MAAGSVESQRSQAASERPVAGQAGVLPCLLELPSYAAACALVGSRYSCLVAAAPHRRHIALS 60
RPA43_ARATH|18410907 -----MEGLKLSAEELMIFIH 16

```

|                      |                                                          |     |
|----------------------|----------------------------------------------------------|-----|
| RPOE_METMA 21226698  | PTLLGEEIMPTIKNALREKLEGQ-----VDKKGSLVAVYNIDEVG-----       | 55  |
| RPOE_METAC 20092492  | PTLLGEEIMPTIKNALREKLEGQ-----VDKKGSLVAVYNIDEVG-----       | 55  |
| RPOE_METBA 23051810  | PTLLGEEVTVKVNALREKLEGQ-----VDKKGSLVAICKIVEIG-----        | 55  |
| RPOE_ARCFU 11498717  | PSKLGEDIEKVINSLLWEQFEGR-----LDREYGMIGIESIEEIG-----       | 55  |
| RPOE_METTH 15678292  | PDRFEEPLEEVAVEVLNETYVGR-----MDKNLGLLITVKEIEDIG-----      | 55  |
| RPOE_PYRHO 14591652  | PRMFTMDPKAAMLVLRDITYEGT-----YDRDEGVILSIVEVKEVG-----      | 55  |
| RPOE_PYRAB 14521883  | PRMFTMDPKAAMLVLRRETYEGK-----YDKDEGVILSIVEVKEVG-----      | 55  |
| RPOE_PYRFU 18976628  | PTMFTMDPKAAKIILRETYEGT-----YDKDEGVILSILEVKDIK-----       | 55  |
| RPOE_METJA 15668573  | PEEFGKDLKETVKKILMEKYEGR-----LDKDVGFVLSIVDVKDIG-----      | 55  |
| RPOE_HALO 15790905   | PEYLGAVGPDVLRKLLQDKLEGR-----MDEDVGSIVTVTEVHDLG-----      | 55  |
| RPOE_THEAC 16082590  | PEMLGEDYDVAVREVTKRSLEGKLVVVNEKTGVNEGKYLVISIISTKAVG-----  | 65  |
| RPOE_THEVO 13541317  | PDMLGEDYDKAVEEVTKRSLEGKLVVVNEKTGVNEGKYLVISIISTKAVG-----  | 65  |
| RPOE_FERAC 22406866  | PELLNDNYSDAVAEASKSTLEGKLVDI--QEGQKNIGKSYIVSVNSIEMKG----- | 63  |
| RPOE_METKA 20094887  | PTQFTSDVEDAVLKALENDVEGKLFRE----DDTGEPIGFVVVFDIILDVE----- | 61  |
| RPOE_SULTO 15920582  | PEYFGQPLDEIALQILRQEQEK-----MIKDLGLVLAVLDAKVSE-----       | 55  |
| RPOE_SULAC 730613    | PEYFGQSVDEIAIKILRQEQEK-----LIKDIGVVLGIVNAKASE-----       | 55  |
| RPOE_SULSO 15897347  | PNEFGKPLNEIALNELRQEQEK-----ILKDLGLVLAAILNVKTSE-----      | 55  |
| RPOE_PYRAE 18314155  | PTEFGKPLEDIALSQLKSRYEGK-----VLREVGYIVAVLNVKVGR-----      | 56  |
| RPOE_AERPE 14600570  | ASIYSSDLDKAALEHLRRLRLEGR-----IDEEMGVIVAVLDAKIVG-----     | 56  |
| RPC25_YEAST 6322705  | PDQFHRDTISAITHQLNNKFANK-----IIPNVGLCITIYDLLTVE-----      | 55  |
| RPC25_SCHPO 19112860 | PSNFWKPTKEALAEIHKKYANK-----VIQNIGLAICVYDFLKIG-----       | 55  |
| RPC25_MOUSE 21313542 | PWQFERKLNDSIAEELNKKLANK-----VVYNVGLCICLFDITKLE-----      | 55  |
| RPC25_HUMAN 22068810 | PWQFERKLNDSIAEELNKKLANK-----VVYNVGLCICLFDITKLE-----      | 55  |
| RPC25_DROME 7294695  | PDQFHLKLVDAVRDEIDRKLANK-----VLLNVGLCIALKDIVSLK-----      | 55  |
| PPC25_ARATH 15222202 | PHLLNLPLEDAIKSVLQNVFLDK-----VLADLGLCVSIYDIKSVE-----      | 55  |
| RPC25_CAEEL 17566938 | PHQLSSDQQIVIKKRLNERLANK-----IIPDLGLCICVYDINEIG-----      | 55  |
| RPB7_SCHPO 19114885  | PSYFGPRMQDYLRKLLADVEGT-----CSGQYGYIICVLDSENTID-----      | 56  |
| RPB7_CANAL 12655858  | PSFGQPMQDYLRKLLSDVEGT-----CTGQFGYIVCVLDSMNID-----        | 55  |
| RPB7_YEAST 6320612   | PSFFGPRMKQYLKTKLLEVEGS-----CTGKFGYIICVLDYDNDID-----      | 55  |
| RPB7_DROME 23171325  | PRYFGPQLLETVKQKLYSEVEGT-----CTGKYGFVIAVTTIDQI-----       | 54  |
| RPB7_ANOGA 21288656  | PRYFGPQLIETVKQKLYTEVEGT-----CTGKYGFVIAVTTIDDI-----       | 54  |
| RPB7_HUMAN 4505947   | PRYFGPNLLNTVKQKLFTEVEGT-----CTGKYGFVIAVTTIDNI-----       | 54  |
| RPB7_CAEEL 17510349  | PKYFGPNLNETIKMKLFNEVEGT-----CTGKYGFVIAVTTIDTI-----       | 54  |
| RPB7_ARATH 15237831  | PRFFGRNLKENLVSKLMKDVEGT-----CSGRHGFVVAITGIDTI-----       | 54  |
| RPB7_SOYBN 1173137   | PRYFGRNLRDNLVSKLMKDVEGT-----CSGRHGFVVAVTGIENI-----       | 54  |
| RPB7_ENCCU 19074596  | PNYLGPNIQALIEEYLLSKVEGS-----CSSS-GYVVMVLSIDEI-----       | 53  |
| RPB7_PLAFA 23508072  | PSQLGPRYQQYIEDMLRNSVEGQ-----CSVKYGYVICVIRIHS-----        | 54  |
| RPB7_PLAYO 23481815  | PSQLGPKYQQYIEDMLRNSIEGQ-----CTEKYGYIICVIRIMHS-----       | 54  |
| RPB7_GILTH 13811986  | AKLLNNQLKSTLIAQLITLTEGL-----PFGNVGSIIMIINIDNQK-----      | 55  |
| RPA43_YEAST 6324916  | PMYLENPLQGVMKQHLNPLVMKY-----NNKVGGVVLGYEGLKILDADPLSKEDT  | 100 |
| RPA43_SCHPO 19113457 | PGHSRDPLNAI-QEHMDSMILSK-----LPRINGIVLAYDNIRFL-----       | 57  |
| RPA43_DROME 7297185  | PYGMANFKHALHELLIRTKVGFY-----DSGLDGIVLGKIKIKVL-----       | 79  |
| RPA43_ANOGA 21288304 | PRDCEHIVKGVKRC-VTDKIGRY-----HAKLNGIVLGYAKIRVD-----       | 79  |
| RPA43_HUMAN 20539462 | PRYLNRKRTGIREQ-LDAELLRY-----SESLLGVPYIAYDNIKVV-----      | 99  |
| RPA43_MOUSE 20847950 | PRYLSRKRRTGIREQ-LDAELLRY-----SESLLGVPYIAYDNIIRVV-----    | 99  |
| RPA43_ARATH 18410907 | PSQSRNVFQIGICRELSLLFQYN-----ETFDGVLLAYDATVKSK-----       | 56  |

RPOE\_METMA|21226698 ---EGHILVGDGAVYYDVTFEAIMFYPLQEIEIEGEVVEAVGFGVFIGM-GPMDGLLHVS 111  
RPOE\_METAC|20092492 ---EGHILVGDGAVYYDVTFEAIMFIPELQEIEIEGEVVEAVGFGVFIGM-GPMDGLLHVS 111  
RPOE\_METBA|23051810 ---EGHILVGDGAVYYDVTFEAIMFVPELQEIEIEGEVVEAVGFGVFIGM-GPMDGLLHVS 111  
RPOE\_ARCFU|11498717 ---EGRIIEGDGGVYFDVVFNAICFRPLHQEVVEGEVIEIVEFGAFVSI-GPFDALLHMS 111  
RPOE\_METTH|15678292 ---IGKIVMGDGAAYHEVTF TALFFKPELHEIVEGEVIEIAEFGAFVRI-GPVDGLVHVS 111  
RPOE\_PYRHO|14591652 ---DGIIVPGDGATYHEVVFVDFLVVWEPKRDEVVEGTVVDVVPFGAFIRI-GPMDGLVHIS 111  
RPOE\_PYRAB|14521883 ---DGIIVPGDGATYHEVVFVDFLVVWEPKQEQEVVEGTVVDVVPFGAFVRI-GPMDGLVHIS 111  
RPOE\_PYRFU|18976628 ---DGIIPPGDGATYHEVVFVDFLVVWEPKIHEVVEGYVADVMPFGAFIRI-GPIDGLVHIS 111  
RPOE\_METJA|15668573 ---EGKVHGDGGSAYHPVVFETLVYIPEMYELIEGEVVDVVEFGSFVRL-GPLDGLIHVS 111  
RPOE\_HALO|15790905 ---EGAVLPNRPGVYEAEFDAVTFPEMQUEIVDGEVVSQKFGAFVGI-GPVDGLLHVS 111  
RPOE\_THEAC|16082590 ---EGTIVHGDGGVYQEVKYRSLVYFPEMQUEIVDGEVVSQKFGAFVGI-GPVDGLLHVS 121  
RPOE\_THEVO|13541317 ---EGSIVHGDGGVYQEVKYRSLVYFPEMQUEIVDGEVVSQKFGAFVGI-GPVDGLLHVS 121  
RPOE\_FERAC|22406866 ---EGTIVHGDGGVYQSIKYSALAYFPMKHEVVDGIVVAVQKFGAFVGI-GPVDGLLHVS 119  
RPOE\_METKA|20094887 ---NEGIFPGDGASYHRVFRFRALVFRPVEREVVVEGTVRVEKEYGAFVRL-GPLDGLLHVS 117  
RPOE\_SULTO|15920582 ---EGYIIFGDGATYHEVSEFEMLAFVPIIQEVVEGEVNVQVDNYGVYVNI-GPVDGLAHIS 111  
RPOE\_SULAC|730613 ---EGFIIIFGDGATYHEVEFDMLVYTPIIHEVIEGEVVSQVDNYGVYVNM-GPVDGLVHIS 111  
RPOE\_SULSO|15897347 ---EGILVFGDGATYHEVEFDMLVYTPIIHEVIEGEVVSQVDNYGVYVNI-GPMDGLVHIS 111  
RPOE\_PYRAE|18314155 ---EGKIVFGDGGTYHRAVFTMLAFMPLDGEVVEGVVENAREMGMLVRI-GPILGFINKI 112  
RPOE\_AERPE|14600570 -DGIIPPVSGDPSIYYPVRYRVLAFKPVQLEIVRGVVTRADDFGLVVNL-GPLDGKVHRN 114  
RPC25\_YEAST|6322705 ---EGQLKPGDGSSYINVTFRAVVFKPFLGEIVTGWISKCTAEGIKVSLGIFDDIFIPQ 112  
RPC25\_SCHPO|19112860 ---EGIIKYGDGSSYMNVVFRLLIIFRPFGEVMLGKIKSCSEEGIRVTI-SFFDDIFIPK 111  
RPC25\_MOUSE|21313542 ---DAYVFPDGDGASHTKVHFRYVVFHFPFLDEILIGKIKGCSPEGVHVSL-GFFDDILIPP 111  
RPC25\_HUMAN|22068810 ---DAYVFPDGDGASHTKVHFRYVVFHFPFLDEILIGKIKGCSPEGVHVSL-GFFDDILIPP 111  
RPC25\_DROME|7294695 ---DSIILPGDGASHTKTEVLFVFRYVVFVFRPMVGTVITGKIRNCSREGVHVTL-GFFDDILIPH 111  
PPC25\_ARATH|15222202 ---GGFVLPDGDGAATYKVLRIVVFVFRPFVGEVIAAKFKESDANGLRLTL-GFFDDIYVPA 111  
RPC25\_CAEEL|17566938 ---DSYILPGEEDCRARVVKFRMIVFRPFVDEVIEAKVIGSSRQGLCLTI-QFFEDIFVPA 111  
RPB7\_SCHPO|19114885 -IDKGRVVPDGDGAEFEVVKYRAVLFWRPFVGEVVDVAVTTVNKMGFFANI-GPLNVFVSSH 114  
RPB7\_CANAL|12655858 -VGKGRILPSTGMAEFVVKYRAVLFWRPFVGEVVDVAVTTVNKMGFFANI-GPLNVFVSTH 113  
RPB7\_YEAST|6320612 -IQRGRIIPTDGSMAEFVVKYRAVLFWRPFVGEVVDVAVTTVNKMGFFANI-GPLNVFVTKH 113  
RPB7\_DROME|23171325 --GSGVIQPGQGFVVYPVKYKAIVFRPFKGEVLDVAVVQINKVGMFAEI-GPLSCFISHH 111  
RPB7\_ANOGA|21288656 --GSGTIQPGQGFVVYPVKYKAIVFRPFKGEVLDVAVVQINKVGMFAEI-GPLSCFISHH 111  
RPB7\_HUMAN|4505947 --GAGVIQPGRGFVLYPVKYKAIVFRPFKGEVLDVAVVQINKVGLFTEI-GPMSCFISRH 111  
RPB7\_CAEEL|17510349 --GHGLIQPGRGFVIYPVRYKAIVFRPFKGEVLDVAVVQINKVGLFTEI-GPLSCFISRH 111  
RPB7\_ARATH|15237831 --GKGLIRDGTGFVTFPVKYQCVVFRPFKGEILEAVVTLVNKMGFFAFAE-GPVQIFVSKH 111  
RPB7\_SOYBN|1173137 --GKGLIRDGTGFVTFPVKYQCVVFRPFKGEILEAVVTMVNKMGFFAFAE-GPVQIFVSNH 111  
RPB7\_ENCCU|19074596 --SESRIIL-TGETIFTVKYKALTLKPLKGEVIDANVETNKMGVFASV-GPLTVFISNH 109  
RPB7\_PLAFA|23508072 --EPGRVQDGTGMIVVKVYQAIIVFKPFKDEVLDAIVTDVNKLGFFAQA-GPLKIFISRT 111  
RPB7\_PLAYO|23481815 --EPGRVQDGTGMIVVKVYQAIIVFKPFKDEVLDAIVTDVNKLGFFAQA-GPLKIFISRT 111  
RPB7\_GILTH|13811986 --LYGKILPGFSSVLFKVNFAVVLKIFKGEIIDAIKVNITSFGIFASA-GILNIFISNK 112  
RPA43\_YEAST|6324916 SEKLIKITPDTPFGFTWCHVNLVWQPQVGDVLEGYIFIQSASHIGLLIHDAFNASIKKN 160  
RPA43\_SCHPO|19113457 -EKSAKVMYDPSFIFWVRVDLVFSPKKGDCLEGKINLVSPSHIGLLILGIFNASSIPRK 116  
RPA43\_DROME|7297185 -GQTAGLRADDPTMHLVINADFYVFRPKAGAILSGVVRHISRHHVSAVIYRVFNNTSIRFT 138  
RPA43\_ANOGA|21288304 -NALSALRLDPSYLVHVRTTIDYVVFQPRIGSTLRGTVNYSKFNVSVAVIYRVFNNTVVKLG 138  
RPA43\_HUMAN|20539462 -GELGDIYDDQGHILHNLIEADFVIFCPEPGQKLMGIVNKVSSSHIGCLVHGCFNASSIPKP 158  
RPA43\_MOUSE|20847950 -GELGDIYDDQGHILHNLIEADFVIFCPEPGQKLMGIVNKVSSSHIGCLVHGCFNASSIPKP 158  
RPA43\_ARATH|18410907 --QAKILTGLHPYFGVRVNRLLLLFDPKPKSFVEGKIVKISPESIHVIVLGFSAAVITDV 114

|                      |                                                               |     |
|----------------------|---------------------------------------------------------------|-----|
| RPOE_METMA 21226698  | QITDD-----FISYDAKNARLVTKS-----GGKSIAEGDHVRARIVAVS-----        | 150 |
| RPOE_METAC 20092492  | QITDD-----FISYDAKNARLVTKN-----GGKSIAEGDHVRARIVAVS-----        | 150 |
| RPOE_METBA 23051810  | QITDD-----FISYDAKNARLVTKN-----GGKSIAEGDHVRARVVAVS-----        | 150 |
| RPOE_ARCFU 11498717  | QVTDD-----YMVFDEKNKRLVGRE-----TKKVLQEGDKVRARIVSLS-----        | 150 |
| RPOE_METTH 15678292  | QVTDD-----YITYDPKKGSLTGKE-----SGRRLDEGLVRRARIVALS-----        | 150 |
| RPOE_PYRHO 14591652  | QLMDD-----YVVYDERNKQFVGKE-----KKYLLKIGDAVRARIITVS-----        | 150 |
| RPOE_PYRAB 14521883  | QLMDD-----YVVYDERNKQFVGKE-----KKYLLKIGDAVRARIITVS-----        | 150 |
| RPOE_PYRFU 18976628  | QLMDD-----YVVYDERNKQFVGKE-----KKYLLKIGDLVRARIINIS-----        | 150 |
| RPOE_METJA 15668573  | QIMDD-----YVSYDPKREAIIGKE-----TGKVLIEIGDYVRARIVAIS-----       | 150 |
| RPOE_HALO 15790905   | QISDE-----YLAFDEENQQLASRE-----SNQVLGTGDSVRARIVTKS-----        | 150 |
| RPOE_THEAC 16082590  | QIMDD-----RIDIDLLENKRFIGKE-----TKRDLKVGDKVRVRIVAMN-----       | 160 |
| RPOE_THEVO 13541317  | QIMDD-----RIDVDLENKRFIGKD-----TKRDLKVGDKVRVRIVALN-----        | 160 |
| RPOE_FERAC 22406866  | QIMDD-----AINIDMENQRIVGKD-----SKMELKVGDKIRVRIVALN-----        | 158 |
| RPOE_METKA 20094887  | QILDE-----YMYDYGAREALVGEE-----TGRELKRGDVIKVMIGVS-----         | 156 |
| RPOE_SULTO 15920582  | QITDD-----NLKFDQNRGILIGER-----SKKIIQKGDVRARIISV-----          | 149 |
| RPOE_SULAC 730613    | QITDD-----NLKFDSNRGILIGEK-----SKKSITKGDVRAMIISA-----          | 149 |
| RPOE_SULSO 15897347  | QITDD-----TLKYDNVRGIIIFGEK-----SKKVIQKGDKVRARIVISVA-----      | 150 |
| RPOE_PYRAE 18314155  | HIMDDP-----NIFFDASTKSYIGER-----TKRRVSVGDVVRARITGVSFTT--       | 155 |
| RPOE_AERPE 14600570  | QIMDE-----GVELLPDRSGFVGLA-----SKREIRVGDVVRARVVHVS-----        | 153 |
| RPC25_YEAST 6322705  | NMLF-----EGCYTPEESAWIWPMDDE-----TKLYFDVNEKIRFRIEREVFDVK       | 159 |
| RPC25_SCHPO 19112860 | DMLF-----DPCVFRPDERAWVWKIEGEDGSEG--TELYFDIDEEIRFQIESEDFVDIS   | 163 |
| RPC25_MOUSE 21313542 | ESLQ-----QPAKFDEAEQVWVWEYETEEGA----HDLYMDTGEEIRFRVVDSEFVDT    | 161 |
| RPC25_HUMAN 22068810 | ESLQ-----QPAKFDEAEQVWVWEYETEEGA----HDLYMDTGEEIRFRVVDSEFVDT    | 161 |
| RPC25_DROME 7294695  | AALQ-----HPSRFDEAEQAVWWEYPLEDGAK---HDLFMDVGEPIKFRVSREIFEETS   | 162 |
| PPC25_ARATH 15222202 | PLMPKPNRC-EPDPYNRKQMIWVWEY----GEPK--EDYIVDDACQIKFRVESISYPSVP  | 164 |
| RPC25_CAEEL 17566938 | EKLP-----EPHVFEEGQVWVWEYAEQEDGEPP--AKLYMDPGKIVRFRVTEIIFKDLK   | 163 |
| RPB7_SCHPO 19114885  | LVPDP-----MKFDPTANPPNYSGEDQ-----VIEKGSNVRKIVGTR-----          | 152 |
| RPB7_CANAL 12655858  | LIPSD-----MKFNPSANPPAYVSPDE-----NIEKGSRVRLKIVGTR-----         | 151 |
| RPB7_YEAST 6320612   | LMPQD-----LTFNAGSNPPSYQSSD-----VITIKSRIRVKIEGCI-----          | 151 |
| RPB7_DROME 23171325  | SIPAD-----MQFCPNGNPPCYKSKDED-----VVISGEDKIRLKIVGTR-----       | 151 |
| RPB7_ANOGA 21288656  | SIPAD-----MQFCPNGAPPYRAINGE-----SVIAAEDKIRLKIVGTR-----        | 151 |
| RPB7_HUMAN 4505947   | SIPSE-----MEFDPNSNPPCYKTMDED-----IVIQQDDEIRLKIVGTR-----       | 151 |
| RPB7_CAEEL 17510349  | CIPPD-----MEFDPNSEKPCYKTNDEA-----NVIRNDDEIRVKLIGTR-----       | 151 |
| RPB7_ARATH 15237831  | LIPDD-----MEF-QAGDMPNYTTSDGS-----VKIQKECEVRLKIIIGTR-----      | 150 |
| RPB7_SOYBN 1173137   | LIPDD-----MEF-QSGDMPNYTTSDGS-----VKIQKDSEVRLKIIIGTR-----      | 150 |
| RPB7_ENCCU 19074596  | QIP-----NFLLENE-----ITKNVMIRLKIIGTK-----                      | 134 |
| RPB7_PLAFA 23508072  | AIPKY-----FEYSEDLHYPCFSSGDY-----NIKPQTTVRIKIQGIR-----         | 149 |
| RPB7_PLAYO 23481815  | AIPKY-----FEYNEDAHYPCFSSGSH-----NIKPQTTVRLKIQGIR-----         | 149 |
| RPB7_GILTH 13811986  | FISQD-----LISQSQTLFNFKNSTI-----NIKKNDIIRCKIILNLK-----         | 150 |
| RPA43_YEAST 6324916  | NIPVDWTF----VHNDVEEDADVINTDENNGNNNNEDNKDSNGGSNSLGKFSFGNRSLSGH | 216 |
| RPA43_SCHPO 19113457 | SIPKDWIF----IEPDTTEEQGRWKTN-----DGNILEPGKDLEFVVDG-----        | 149 |
| RPA43_DROME 7297185  | NQSASRE----DIAMDQEIIRIKNFD-----ISNLMPYIEGELLLENGEAPK          | 182 |
| RPA43_ANOGA 21288304 | QQTARLH----ALKNGSDISFTVNSCD-----MKSELPVIEGELVLNGVIPVR         | 182 |
| RPA43_HUMAN 20539462 | EQLSAEQWQTMEINMGDELEFEVFRLD-----SDAAGVFCIRGKLNITSLQFKR        | 207 |
| RPA43_MOUSE 20847950 | EQMSYEEWQTLEIHVGDELEFDVFRLD-----SDSAGVFCIRGKLSSTSLQLKH        | 207 |
| RPA43_ARATH 18410907 | DIREEF-----KYRVRDGESEFVSR-----SHKRHALKLGTMRLRLQVQSF           | 155 |



|                      |                                                                   |       |
|----------------------|-------------------------------------------------------------------|-------|
| RPOE_METMA 21226698  | WLEEARRKKQPQETPGEEAA-----                                         | 194   |
| RPOE_METAC 20092492  | WLEEARRKKQPQEAPGKEAA-----                                         | 194   |
| RPOE_METBA 23051810  | WLEEARRKKQSHEAVPEGAA-----                                         | 194   |
| RPOE_ARCFU 11498717  | WIEEEIEKLMKESGV-----                                              | 189   |
| RPOE_METTH 15678292  | WIEEEKRKSJK-----                                                  | 184   |
| RPOE_PYRHO 14591652  | WIEKEKRKEKEGKK-----                                               | 188   |
| RPOE_PYRAB 14521883  | WIEKEKRKEKEGKK-----                                               | 188   |
| RPOE_PYRFU 18976628  | WIEKEKKKEKEEGKK-----                                              | 189   |
| RPOE_METJA 15668573  | WIEEEKAKKQNE-----                                                 | 187   |
| RPOE_HALO 15790905   | WLQADREQADAASEGE-----                                             | 190   |
| RPOE_THEAC 16082590  | WLAKEASQ-----                                                     | 192   |
| RPOE_THEVO 13541317  | WLEKEAQA-----                                                     | 192   |
| RPOE_FERAC 22406866  | WMKKENVNN-----                                                    | 191   |
| RPOE_METKA 20094887  | WWE-----                                                          | 183   |
| RPOE_SULTO 15920582  | WISQELTKASK-----                                                  | 183   |
| RPOE_SULAC 730613    | MDKSRNSKGEK-----                                                  | 183   |
| RPOE_SULSO 15897347  | WITQTKK-----                                                      | 180   |
| RPOE_PYRAE 18314155  | WVKEKKPAAKKA-----                                                 | 191   |
| RPOE_AERPE 14600570  | WVAPEAKKG-----                                                    | 186   |
| RPC25_YEAST 6322705  | WWE-----                                                          | 212   |
| RPC25_SCHPO 19112860 | WWK-----                                                          | 203   |
| RPC25_MOUSE 21313542 | WWTSN-----                                                        | 204   |
| RPC25_HUMAN 22068810 | WWTS-----                                                         | 204   |
| RPC25_DROME 7294695  | WWDQQGKDDEQDDEEDEEYDDEDGEGACEE-----                               | 240   |
| PPC25_ARATH 15222202 | WWDS-----YEQVDQEE-----                                            | 204   |
| RPC25_CAEEL 17566938 | WWAAEDEDDEAVEDEQDEQEEVVIQPKKEIROPQEEVROPVKIKEEPV-----             | 239   |
| RPB7_SCHPO 19114885  | -----                                                             | ----- |
| RPB7_CANAL 12655858  | M-----                                                            | 173   |
| RPB7_YEAST 6320612   | -----                                                             | ----- |
| RPB7_DROME 23171325  | N-----                                                            | 173   |
| RPB7_ANOGA 21288656  | S-----                                                            | 173   |
| RPB7_HUMAN 4505947   | -----                                                             | 172   |
| RPB7_CAEEL 17510349  | AE-----                                                           | 174   |
| RPB7_ARATH 15237831  | DPAAA-----                                                        | 176   |
| RPB7_SOYBN 1173137   | DPATV-----                                                        | 176   |
| RPB7_ENCCU 19074596  | -----                                                             | ----- |
| RPB7_PLAFA 23508072  | SNILQVM-----                                                      | 177   |
| RPB7_PLAYO 23481815  | SNALQVM-----                                                      | 177   |
| RPB7_GILTH 13811986  | -----                                                             | ----- |
| RPA43_YEAST 6324916  | VSVDGTLISDAADEEGNGYNSSRADEEGNGYNSSRSQAESLPIVSNKKIVFDDEVSIENK----- | 289   |
| RPA43_SCHPO 19113457 | -----                                                             | ----- |
| RPA43_DROME 7297185  | NGENGDTTKTKKVKKEIKSEPI-----                                       | 253   |
| RPA43_ANOGA 21288304 | EKSNGGPVETVRIKQEVLSDDDEPSAVVEQOPTASTQGKAKSKKNGTNGVHLNGSAATP-----  | 284   |
| RPA43_HUMAN 20539462 | NNANGIWEEEPKKKKKKKKKHQEVQDQDPVFGSDSSGYQSDHKKKKKKRKHSEEAFTPP-----  | 324   |
| RPA43_MOUSE 20847950 | DNVNDFFEPEPKKKKKKKRHRQ-EDQDPIFQASDSSGYQSDHNKKKKKKRKHSEANFESP----- | 326   |
| RPA43_ARATH 18410907 | EKKSEEALPTDRDHKRRKLA-----                                         | 196   |

|                      |                                       |     |
|----------------------|---------------------------------------|-----|
| RPOE_METMA 21226698  | -----                                 |     |
| RPOE_METAC 20092492  | -----                                 |     |
| RPOE_METBA 23051810  | -----                                 |     |
| RPOE_ARCFU 11498717  | -----                                 |     |
| RPOE_METTH 15678292  | -----                                 |     |
| RPOE_PYRHO 14591652  | -----                                 |     |
| RPOE_PYRAB 14521883  | -----                                 |     |
| RPOE_PYRFU 18976628  | -----                                 |     |
| RPOE_METJA 15668573  | -----                                 |     |
| RPOE_HALO 15790905   | -----                                 |     |
| RPOE_THEAC 16082590  | -----                                 |     |
| RPOE_THEVO 13541317  | -----                                 |     |
| RPOE_FERAC 22406866  | -----                                 |     |
| RPOE_METKA 20094887  | -----                                 |     |
| RPOE_SULTO 15920582  | -----                                 |     |
| RPOE_SULAC 730613    | -----                                 |     |
| RPOE_SULSO 15897347  | -----                                 |     |
| RPOE_PYRAE 18314155  | -----                                 |     |
| RPOE_AERPE 14600570  | -----                                 |     |
| RPC25_YEAST 6322705  | -----                                 |     |
| RPC25_SCHPO 19112860 | -----                                 |     |
| RPC25_MOUSE 21313542 | -----                                 |     |
| RPC25_HUMAN 22068810 | -----                                 |     |
| RPC25_DROME 7294695  | -----                                 |     |
| PPC25_ARATH 15222202 | -----                                 |     |
| RPC25_CAEEL 17566938 | -----                                 |     |
| RPB7_SCHPO 19114885  | -----                                 |     |
| RPB7_CANAL 12655858  | -----                                 |     |
| RPB7_YEAST 6320612   | -----                                 |     |
| RPB7_DROME 23171325  | -----                                 |     |
| RPB7_ANOGA 21288656  | -----                                 |     |
| RPB7_HUMAN 4505947   | -----                                 |     |
| RPB7_CAEEL 17510349  | -----                                 |     |
| RPB7_ARATH 15237831  | -----                                 |     |
| RPB7_SOYBN 1173137   | -----                                 |     |
| RPB7_ENCCU 19074596  | -----                                 |     |
| RPB7_PLAFA 23508072  | -----                                 |     |
| RPB7_PLAYO 23481815  | -----                                 |     |
| RPB7_GILTH 13811986  | -----                                 |     |
| RPA43_YEAST 6324916  | ESHKELDLPEVKEDNGSEIVYEENTSESNDGESSDSD | 326 |
| RPA43_SCHPO 19113457 | -----                                 |     |
| RPA43_DROME 7297185  | -----                                 |     |
| RPA43_ANOGA 21288304 | ASADAANGETTTTTT-----                  | 298 |
| RPA43_HUMAN 20539462 | LKCSPKRKGKSNFL-----                   | 338 |
| RPA43_MOUSE 20847950 | KKRQ-----                             | 330 |
| RPA43_ARATH 18410907 | -----                                 |     |
